# Supplementary material
Source: ML conference proceedings conference paper supplement (https://proceedings.mlr.press/v51/rabusseau16.html)
Supplement: Supplementary file 1 [file rabusseau16-supp.pdf]

---

# Low-Rank Approximation of Weighted Tree Automata (Supplementary Material)

---

Guillaume Rabusseau  
Aix-Marseille University

Borja Balle  
Lancaster University

Shay B. Cohen  
University of Edinburgh

## 1 Proof of Theorem 2

**Theorem.** *Let  $f : \mathfrak{T} \rightarrow \mathbb{R}$  be rational. If  $\mathbf{H}_f = \mathbf{P}\mathbf{S}$  is a rank factorization, then there exists a minimal WTA  $A$  computing  $f$  such that  $\mathbf{P}_A = \mathbf{P}$  and  $\mathbf{S}_A = \mathbf{S}$ .*

*Proof.* Let  $n = \text{rank}(f)$ . Let  $B$  be an arbitrary minimal WTA computing  $f$ . Suppose  $B$  induces the rank factorization  $\mathbf{H}_f = \mathbf{P}'\mathbf{S}'$ . Since the columns of both  $\mathbf{P}$  and  $\mathbf{P}'$  are basis for the column-span of  $\mathbf{H}_f$ , there must exist a change of basis  $\mathbf{Q} \in \mathbb{R}^{n \times n}$  between  $\mathbf{P}$  and  $\mathbf{P}'$ . That is,  $\mathbf{Q}$  is an invertible matrix such that  $\mathbf{P}'\mathbf{Q} = \mathbf{P}$ . Furthermore, since  $\mathbf{P}'\mathbf{S}' = \mathbf{H}_f = \mathbf{P}\mathbf{S} = \mathbf{P}'\mathbf{Q}\mathbf{S}$  and  $\mathbf{P}'$  has full column rank, we must have  $\mathbf{S}' = \mathbf{Q}\mathbf{S}$ , or equivalently,  $\mathbf{Q}^{-1}\mathbf{S}' = \mathbf{S}$ . Thus, we let  $A = B^{\mathbf{Q}}$ , which immediately verifies  $f_A = f_B = f$ . It remains to be shown that  $A$  induces the rank factorization  $\mathbf{H}_f = \mathbf{P}\mathbf{S}$ . Note that when proving the equivalence  $f_A = f_B$  we already showed  $\omega_A(t) = \mathbf{Q}^{-1}\omega_B(t)$ , which means we have  $\mathbf{S}_A = \mathbf{Q}^{-1}\mathbf{S}' = \mathbf{S}$ . To show  $\mathbf{P}_A = \mathbf{P}'\mathbf{Q}$  we need to show that for any  $c \in \mathfrak{C}$  we have  $\alpha_A(c)^\top = \alpha_B(c)^\top \mathbf{Q}$ . This will immediately follow if we show that  $\Xi_A(c) = \mathbf{Q}^{-1}\Xi_B(c)\mathbf{Q}$ . If we proceed by induction on  $\text{drop}(c)$ , we see the case  $c = *$  is immediate, and for  $c = (c', t)$  we get

$$\begin{aligned} \Xi_A((c', t)) &= (\mathcal{T}(\mathbf{Q}^{-\top}, \mathbf{Q}, \mathbf{Q}))(\mathbf{I}, \Xi_A(c'), \omega_A(t)) \\ &= (\mathcal{T}(\mathbf{Q}^{-\top}, \mathbf{Q}, \mathbf{Q}))(\mathbf{I}, \mathbf{Q}^{-1}\Xi_B(c')\mathbf{Q}, \mathbf{Q}^{-1}\omega_B(t)) \\ &= \mathcal{T}(\mathbf{Q}^{-\top}, \Xi_B(c')\mathbf{Q}, \omega_B(t)) \\ &= \mathbf{Q}^{-1}\mathcal{T}(\mathbf{I}, \Xi_B(c'), \omega_B(t))\mathbf{Q} . \end{aligned}$$

Applying the same argument mutatis mutandis for  $c = (t, c')$  completes the proof.  $\square$

## 2 Proof of Theorem 3

**Theorem.** *If  $f : \mathfrak{T}_\Sigma \rightarrow \mathbb{R}$  is rational and strongly convergent, then  $\mathbf{H}_f$  admits a singular value decomposition.*

*Proof.* The result will follow if we show that  $\mathbf{H}_f$  is the matrix of a compact operator between Hilbert spaces

[2]. We start by defining the Hilbert spaces of square-summable series indexed by trees and contexts. Given two functions  $g, g' : \mathfrak{T}_\Sigma \rightarrow \mathbb{R}$  we define their inner product to be  $\langle g, g' \rangle_{\mathfrak{T}} = \sum_{t \in \mathfrak{T}_\Sigma} g(t)g'(t)$  (whenever the sum converges). Let  $\|g\|_{\mathfrak{T}} = \sqrt{\langle g, g \rangle_{\mathfrak{T}}}$  be the induced norm. We denote by  $\ell_{\mathfrak{T}}^2$  be the real vector space of functions  $\{g : \mathfrak{T} \rightarrow \mathbb{R} \mid \|g\|_{\mathfrak{T}} < \infty\}$ , which is a separable Hilbert space because the set  $\mathfrak{T}$  is countable. Similarly, given functions  $g, g' : \mathfrak{C}_\Sigma \rightarrow \mathbb{R}$  we define an inner product  $\langle g, g' \rangle_{\mathfrak{C}} = \sum_{c \in \mathfrak{C}_\Sigma} g(c)g'(c)$ , a norm  $\|g\|_{\mathfrak{C}} = \sqrt{\langle g, g \rangle_{\mathfrak{C}}}$ , and a separable Hilbert space  $\ell_{\mathfrak{C}}^2 = \{g : \mathfrak{C} \rightarrow \mathbb{R} \mid \|g\|_{\mathfrak{C}} < \infty\}$ . With this notation it is possible to see that  $\mathbf{H}_f$  is the matrix under the standard basis on  $\ell_{\mathfrak{T}}^2$  and  $\ell_{\mathfrak{C}}^2$  of the operator  $H_f : \ell_{\mathfrak{T}}^2 \rightarrow \ell_{\mathfrak{C}}^2$  given by  $(H_f g)(c) = \sum_{t \in \mathfrak{T}_\Sigma} f(c[t])g(t)$ . Since  $f$  is rational,  $\mathbf{H}_f$  is a finite-rank matrix and therefore  $H_f$  is a finite-rank operator. Thus, to show the compactness of  $H_f$  it only remains to show that  $H_f$  is bounded.

Given  $f \in \ell_{\mathfrak{T}}^2$  and  $c \in \mathfrak{C}_\Sigma$  we define a new function  $f_c \in \ell_{\mathfrak{T}}^2$  given by  $f_c(t) = f(c[t])$  for  $t \in \mathfrak{T}_\Sigma$ . Now let  $g \in \ell_{\mathfrak{T}}^2$  with  $\|g\|_{\mathfrak{T}} = 1$  and recall  $H_f$  is bounded if  $\|H_f g\|_{\mathfrak{C}} < \infty$  for every  $g \in \ell_{\mathfrak{T}}^2$  with  $\|g\|_{\mathfrak{T}} = 1$ . To show that  $H_f$  is bounded observe that we have:

$$\begin{aligned} \|H_f g\|_{\mathfrak{C}}^2 &= \sum_{c \in \mathfrak{C}_\Sigma} (H_f g)(c)^2 = \sum_{c \in \mathfrak{C}_\Sigma} \left( \sum_{t \in \mathfrak{T}_\Sigma} f(c[t])g(t) \right)^2 \\ &= \sum_{c \in \mathfrak{C}_\Sigma} \langle f_c, g \rangle_{\mathfrak{T}}^2 \leq \|g\|_{\mathfrak{T}}^2 \sum_{c \in \mathfrak{C}_\Sigma} \|f_c\|_{\mathfrak{T}}^2 \\ &= \sum_{c \in \mathfrak{C}_\Sigma} \sum_{t \in \mathfrak{T}_\Sigma} f_c(t)^2 = \sum_{c \in \mathfrak{C}_\Sigma} \sum_{t \in \mathfrak{T}_\Sigma} f(c[t])^2 \\ &= \sum_{t \in \mathfrak{T}_\Sigma} |f(t)|^2 \leq \sup_{t \in \mathfrak{T}_\Sigma} |f(t)| \cdot \sum_{t \in \mathfrak{T}_\Sigma} |f(t)| \\ &< \infty , \end{aligned}$$

where we used the Cauchy–Schwarz inequality, and the fact that  $\sup_{t \in \mathfrak{T}_\Sigma} |f(t)|$  is bounded when  $f$  is strongly convergent.  $\square$

### 3 Proof of Theorem 5

**Theorem.** Let  $F : \mathbb{R}^{n^2} \rightarrow \mathbb{R}^{n^2}$  be the mapping defined by  $F(\mathbf{v}) = \mathcal{T}^\otimes(\mathbf{I}, \mathbf{v}, \mathbf{v}) + \sum_{\sigma \in \Sigma} \omega_\sigma^\otimes$ . Then the following hold:

- (i)  $\mathbf{s}$  is a fixed-point of  $F$ ; i.e.  $F(\mathbf{s}) = \mathbf{s}$ .
- (ii)  $\mathbf{0}$  is in the basin of attraction of  $\mathbf{s}$ ; i.e.  $\lim_{k \rightarrow \infty} F^k(\mathbf{0}) = \mathbf{s}$ .
- (iii) The iteration defined by  $\mathbf{s}_0 = \mathbf{0}$  and  $\mathbf{s}_{k+1} = F(\mathbf{s}_k)$  converges linearly to  $\mathbf{s}$ ; i.e. there exists  $0 < \rho < 1$  such that  $\|\mathbf{s}_k - \mathbf{s}\|_2 \leq \mathcal{O}(\rho^k)$ .

*Proof.* (i) We have  $\mathcal{T}^\otimes(\mathbf{I}, \mathbf{s}, \mathbf{s}) = \sum_{t, t' \in \mathfrak{T}} \mathcal{T}^\otimes(\mathbf{I}, \omega^\otimes(t), \omega^\otimes(t')) = \sum_{t, t' \in \mathfrak{T}} \omega^\otimes((t, t')) = \sum_{t \in \mathfrak{T}^{\geq 1}} \omega^\otimes(t)$  where  $\mathfrak{T}^{\geq 1}$  is the set of trees of depth at least one. Hence  $F(\mathbf{s}) = \sum_{t \in \mathfrak{T}^{\geq 1}} \omega^\otimes(t) + \sum_{\sigma \in \Sigma} \omega_\sigma^\otimes = \mathbf{s}$ .

(ii) Let  $\mathfrak{T}^{\leq k}$  denote the set of all trees with depth at most  $k$ . We prove by induction on  $k$  that  $F^k(\mathbf{0}) = \sum_{t \in \mathfrak{T}^{\leq k}} \omega^\otimes(t)$ , which implies that  $\lim_{k \rightarrow \infty} F^k(\mathbf{0}) = \mathbf{s}$ . This is straightforward for  $k = 0$ . Assuming it is true for all naturals up to  $k - 1$ , we have

$$\begin{aligned} F^k(\mathbf{0}) &= \mathcal{T}^\otimes(\mathbf{I}, F^{k-1}(\mathbf{0}), F^{k-1}(\mathbf{0})) + \sum_{\sigma \in \Sigma} \omega_\sigma^\otimes \\ &= \sum_{t, t' \in \mathfrak{T}^{\leq k-1}} \mathcal{T}^\otimes(\mathbf{I}, \omega^\otimes(t), \omega^\otimes(t')) + \sum_{\sigma \in \Sigma} \omega_\sigma^\otimes \\ &= \sum_{t, t' \in \mathfrak{T}^{\leq k-1}} \omega^\otimes((t, t')) + \sum_{\sigma \in \Sigma} \omega_\sigma^\otimes \\ &= \sum_{t \in \mathfrak{T}^{\leq k}} \omega^\otimes(t). \end{aligned}$$

(iii) Let  $\mathbf{E}$  be the Jacobian of  $F$  around  $\mathbf{s}$ , we show that the spectral radius  $\rho(\mathbf{E})$  of  $\mathbf{E}$  is less than one, which implies the result by Ostrowski's theorem (see [4, Theorem 8.1.7]).

Since  $A$  is minimal, there exists trees  $t_1, \dots, t_n \in \mathfrak{T}$  and contexts  $c_1, \dots, c_n \in \mathfrak{C}$  such that both  $\{\omega(t_i)\}_{i \in [n]}$  and  $\{\alpha(c_i)\}_{i \in [n]}$  are sets of linear independent vectors in  $\mathbb{R}^n$  [1]. Therefore, the sets  $\{\omega(t_i) \otimes \omega(t_j)\}_{i, j \in [n]}$  and  $\{\alpha(c_i) \otimes \alpha(c_j)\}_{i, j \in [n]}$  are sets of linear independent vectors in  $\mathbb{R}^{n^2}$ . Let  $\mathbf{v} \in \mathbb{R}^{n^2}$  be an eigenvector of  $\mathbf{E}$  with eigenvalue  $\lambda \neq 0$ , and let  $\mathbf{v} = \sum_{i, j \in [n]} \beta_{i, j} (\omega(t_i) \otimes \omega(t_j))$  be its expression in terms of the basis given by  $\{\omega(t_i) \otimes \omega(t_j)\}$ . For any vector  $\mathbf{u} \in \{\alpha(c_i) \otimes \alpha(c_j)\}$  we have

$$\begin{aligned} \lim_{k \rightarrow \infty} \mathbf{u}^\top \mathbf{E}^k \mathbf{v} &\leq \lim_{k \rightarrow \infty} |\mathbf{u}^\top \mathbf{E}^k \mathbf{v}| \\ &\leq \sum_{i, j \in [n]} |\beta_{i, j}| \lim_{k \rightarrow \infty} |\mathbf{u}^\top \mathbf{E}^k (\omega(t_i) \otimes \omega(t_j))| = 0, \end{aligned}$$

where we used Lemma 1 in the last step. Since this is true for any vector  $\mathbf{u}$  in the basis  $\{\alpha(c_i) \otimes \alpha(c_j)\}$ , we have  $\lim_{k \rightarrow \infty} \mathbf{E}^k \mathbf{v} = \lim_{k \rightarrow \infty} |\lambda|^k \mathbf{v} = \mathbf{0}$ , hence  $|\lambda| < 1$ . This reasoning holds for any eigenvalue of  $\mathbf{E}$ , hence  $\rho(\mathbf{E}) < 1$ .  $\square$

**Lemma 1.** Let  $A = \langle \alpha, \mathcal{T}, \{\omega_\sigma\} \rangle$  be a minimal WTA of dimension  $n$  computing the strongly convergent function  $f$ , and let  $\mathbf{E} \in \mathbb{R}^{n^2 \times n^2}$  be the Jacobian around  $\mathbf{s} = \sum_{t \in \mathfrak{T}} \omega(t) \otimes \omega(t)$  of the mapping  $F : \mathbf{v} \rightarrow \mathcal{T}^\otimes(\mathbf{I}, \mathbf{v}, \mathbf{v}) + \sum_{\sigma \in \Sigma} \omega_\sigma^\otimes$ . Then for any  $c_1, c_2 \in \mathfrak{C}$  and any  $t_1, t_2 \in \mathfrak{T}$  we have  $\lim_{k \rightarrow \infty} |(\alpha(c_1) \otimes \alpha(c_2))^\top \mathbf{E}^k (\omega(t_1) \otimes \omega(t_2))| = 0$ .

*Proof.* Let  $\Xi^\otimes : \mathfrak{C} \rightarrow \mathbb{R}^{n^2 \times n^2}$  be the context mapping associated with the WTA  $A^\otimes$ ; i.e.  $\Xi^\otimes = \Xi_{A^\otimes}$ . We start by proving by induction on  $\text{drop}(c)$  that  $\Xi^\otimes(c) = \Xi(c) \otimes \Xi(c)$  for all  $c \in \mathfrak{C}$ . Let  $\mathfrak{C}^d$  denote the set of contexts  $c \in \mathfrak{C}$  with  $\text{drop}(c) = d$ . The statement is trivial for  $c \in \mathfrak{C}^0$ . Assume the statement is true for all naturals up to  $d - 1$  and let  $c = (t, c') \in \mathfrak{C}^d$  for some  $t \in \mathfrak{T}$  and  $c' \in \mathfrak{C}^{d-1}$ . Then using our inductive hypothesis we have that

$$\begin{aligned} \Xi^\otimes(c) &= \mathcal{T}^\otimes(\mathbf{I}_{n^2}, \omega(t) \otimes \omega(t), \Xi(c') \otimes \Xi(c')) \\ &= \mathcal{T}(\mathbf{I}_n, \omega(t), \Xi(c')) \otimes \mathcal{T}(\mathbf{I}_n, \omega(t), \Xi(c')) \\ &= \Xi(c) \otimes \Xi(c). \end{aligned}$$

The case  $c = (c', t)$  follows from an identical argument.

Next we use the multi-linearity of  $F$  to expand  $F(\mathbf{s} + \mathbf{h})$  for a vector  $\mathbf{h} \in \mathbb{R}^{n^2}$ . Keeping the terms that are linear in  $\mathbf{h}$  we obtain that  $\mathbf{E} = \mathcal{T}^\otimes(\mathbf{I}, \mathbf{s}, \mathbf{I}) + \mathcal{T}^\otimes(\mathbf{I}, \mathbf{I}, \mathbf{s})$ . It follows that  $\mathbf{E} = \sum_{c \in \mathfrak{C}^1} \Xi^\otimes(c)$ , and it can be shown by induction on  $k$  that  $\mathbf{E}^k = \sum_{c \in \mathfrak{C}^k} \Xi^\otimes(c)$ .

Writing  $d_c = \min(\text{drop}(c_1), \text{drop}(c_2))$  and  $d_t =$

$\min(\text{depth}(t_1), \text{depth}(t_2))$ , we can see that

$$\begin{aligned}
 & |(\boldsymbol{\alpha}(c_1) \otimes \boldsymbol{\alpha}(c_2))^\top \mathbf{E}^k(\boldsymbol{\omega}(t_1) \otimes \boldsymbol{\omega}(t_2))| \\
 &= \left| \sum_{c \in \mathcal{C}^k} (\boldsymbol{\alpha}(c_1) \otimes \boldsymbol{\alpha}(c_2))^\top \Xi^\otimes(c)(\boldsymbol{\omega}(t_1) \otimes \boldsymbol{\omega}(t_2)) \right| \\
 &= \left| \sum_{c \in \mathcal{C}^k} (\boldsymbol{\alpha}(c_1)^\top \Xi(c)\boldsymbol{\omega}(t_1)) \cdot (\boldsymbol{\alpha}(c_2)^\top \Xi(c)\boldsymbol{\omega}(t_2)) \right| \\
 &= \left| \sum_{c \in \mathcal{C}^k} f(c_1[c[t_1]])f(c_2[c[t_2]]) \right| \\
 &\leq \left( \sum_{c \in \mathcal{C}^k} |f(c_1[c[t_1]])| \right) \left( \sum_{c \in \mathcal{C}^k} |f(c_2[c[t_2]])| \right) \\
 &\leq \left( \sum_{t \in \mathfrak{T}^{\geq d_c+d_t+k}} |t| |f(t)| \right)^2,
 \end{aligned}$$

which tends to 0 with  $k \rightarrow \infty$  since  $f$  is strongly convergent. To prove the last inequality, check that any tree of the form  $t' = c[c'[t]]$  satisfies  $\text{depth}(t') \geq \text{drop}(c) + \text{drop}(c') + \text{depth}(t)$ , and that for fixed  $c \in \mathcal{C}$  and  $t, t' \in \mathfrak{T}$  we have  $|\{c' \in \mathcal{C} : c[c'[t]] = t'\}| \leq |t'|$  (indeed, a factorization  $t' = c[c'[t]]$  is fixed once the root of  $t$  is chosen in  $t'$ , which can be done in at most  $|t'|$  different ways).  $\square$

## 4 Proof of Theorem 6

**Theorem.** *There exists  $0 < \rho < 1$  such that after  $k$  iterations in Algorithm 2, the approximations  $\hat{\mathbf{G}}_{\mathcal{C}}$  and  $\hat{\mathbf{G}}_{\mathfrak{T}}$  satisfy  $\|\mathbf{G}_{\mathcal{C}} - \hat{\mathbf{G}}_{\mathcal{C}}\|_F \leq \mathcal{O}(\rho^k)$  and  $\|\mathbf{G}_{\mathfrak{T}} - \hat{\mathbf{G}}_{\mathfrak{T}}\|_F \leq \mathcal{O}(\rho^k)$ .*

*Proof.* The result for the Gram matrix  $\mathbf{G}_{\mathfrak{T}}$  directly follows from Theorem 5. We now show how the error in the approximation of  $\mathbf{G}_{\mathfrak{T}} = \text{reshape}(\mathbf{s}, n \times n)$  affects the approximation of  $\mathbf{q} = (\boldsymbol{\alpha}^\otimes)^\top (\mathbf{I} - \mathbf{E})^{-1} = \text{vec}(\mathbf{G}_{\mathcal{C}})$ . Let  $\hat{\mathbf{s}} \in \mathbb{R}^n$  be such that  $\|\mathbf{s} - \hat{\mathbf{s}}\| \leq \varepsilon$ , let  $\hat{\mathbf{E}} = \mathcal{T}^\otimes(\mathbf{I}, \hat{\mathbf{s}}, \mathbf{I}) + \mathcal{T}^\otimes(\mathbf{I}, \mathbf{I}, \hat{\mathbf{s}})$  and let  $\mathbf{q} = (\boldsymbol{\alpha}^\otimes)^\top (\mathbf{I} - \hat{\mathbf{E}})^{-1}$ . We first bound the distance between  $\mathbf{E}$  and  $\hat{\mathbf{E}}$ . We have

$$\begin{aligned}
 \|\mathbf{E} - \hat{\mathbf{E}}\|_F &= \|\mathcal{T}^\otimes(\mathbf{I}, \mathbf{s} - \hat{\mathbf{s}}, \mathbf{I}) + \mathcal{T}^\otimes(\mathbf{I}, \mathbf{I}, \mathbf{s} - \hat{\mathbf{s}})\|_F \\
 &\leq 2\|\mathcal{T}^\otimes\|_F \|\mathbf{s} - \hat{\mathbf{s}}\| \\
 &= \mathcal{O}(\varepsilon),
 \end{aligned}$$

where we used the bounds  $\|\mathcal{T}(\mathbf{I}, \mathbf{I}, \mathbf{v})\|_F \leq \|\mathcal{T}\|_F \|\mathbf{v}\|$  and  $\|\mathcal{T}(\mathbf{I}, \mathbf{v}, \mathbf{I})\|_F \leq \|\mathcal{T}\|_F \|\mathbf{v}\|$ .

Let  $\delta = \|\mathbf{E} - \hat{\mathbf{E}}\|$  and let  $\sigma$  be the smallest nonzero eigenvalue of the matrix  $\mathbf{I} - \mathbf{E}$ . It follows from [3, Equation (7.2)] that if  $\delta < \sigma$  then  $\|(\mathbf{I} - \mathbf{E})^{-1} - (\mathbf{I} - \hat{\mathbf{E}})^{-1}\| \leq$

$\delta/(\sigma(\sigma - \delta))$ . Since  $\delta = \mathcal{O}(\varepsilon)$  from our previous bound, the condition  $\delta \leq \sigma/2$  will be eventually satisfied as  $\varepsilon \rightarrow 0$ , in which case we can conclude that

$$\begin{aligned}
 \|\mathbf{G}_{\mathcal{C}} - \hat{\mathbf{G}}_{\mathcal{C}}\|_F &= \|\mathbf{q} - \hat{\mathbf{q}}\| \\
 &\leq \|(\mathbf{I} - \mathbf{E})^{-1} - (\mathbf{I} - \hat{\mathbf{E}})^{-1}\| \|\boldsymbol{\alpha}^\otimes\| \\
 &\leq \frac{2\delta}{\sigma^2} \|\boldsymbol{\alpha}^\otimes\| \\
 &= \mathcal{O}(\varepsilon).
 \end{aligned}$$

$\square$

## 5 Proof of Theorem 4

Let  $A = \langle \boldsymbol{\alpha}, \mathcal{T}, \{\boldsymbol{\omega}_\sigma\}_{\sigma \in \Sigma} \rangle$  be a SVTA with  $n$  states realizing a function  $f$  and let  $\mathfrak{s}_1 \geq \mathfrak{s}_2 \geq \dots \geq \mathfrak{s}_n$  be the singular values of the Hankel matrix  $\mathbf{H}_f$ .

Theorem 4 relies on the following lemma, which explores the consequences that the fixed-point equations used to compute  $\mathbf{G}_{\mathfrak{T}}$  and  $\mathbf{G}_{\mathcal{C}}$  have for an SVTA.

**Lemma 2.** *For all  $i \in [n]$ , the following hold:*

1.  $\mathfrak{s}_i = \sum_{\sigma \in \Sigma} \boldsymbol{\omega}_\sigma(i)^2 + \sum_{j,k=1}^n \mathcal{T}(i, j, k)^2 \mathfrak{s}_j \mathfrak{s}_k$ ,
2.  $\mathfrak{s}_i = \boldsymbol{\alpha}(j)^2 + \sum_{j,k=1}^n (\mathcal{T}(j, i, k)^2 + \mathcal{T}(j, k, i)^2) \mathfrak{s}_j \mathfrak{s}_k$ .

*Proof.* Let  $\mathbf{G}_{\mathfrak{T}}$  and  $\mathbf{G}_{\mathcal{C}}$  be the Gram matrices associated with the rank factorization of  $\mathbf{H}_f$ . Since  $A$  is a SVTA we have  $\mathbf{G}_{\mathfrak{T}} = \mathbf{G}_{\mathcal{C}} = \mathbf{D}$  where  $\mathbf{D} = \text{diag}(\mathfrak{s}_1, \dots, \mathfrak{s}_n)$  is a diagonal matrix with the Hankel singular values on the diagonal. The first equality then follows from the following fixed point characterization of  $\mathbf{G}_{\mathfrak{T}}$ :

$$\begin{aligned}
 \mathbf{G}_{\mathfrak{T}} &= \sum_{t \in \mathfrak{T}} \boldsymbol{\omega}(t) \boldsymbol{\omega}(t)^\top \\
 &= \sum_{\sigma \in \Sigma} \boldsymbol{\omega}_\sigma \boldsymbol{\omega}_\sigma^\top \\
 &\quad + \sum_{t_1, t_2 \in \mathfrak{T}} \mathcal{T}(\mathbf{I}, \boldsymbol{\omega}(t_1), \boldsymbol{\omega}(t_2)) \mathcal{T}(\mathbf{I}, \boldsymbol{\omega}(t_1), \boldsymbol{\omega}(t_2))^\top \\
 &= \sum_{\sigma \in \Sigma} \boldsymbol{\omega}_\sigma \boldsymbol{\omega}_\sigma^\top + \mathbf{T}_{(1)}(\mathbf{G}_{\mathfrak{T}} \otimes \mathbf{G}_{\mathfrak{T}}) \mathbf{T}_{(1)}^\top,
 \end{aligned}$$

(where  $\mathbf{T}_{(i)}$  denotes the matricization of the tensor  $\mathcal{T}$  along the  $i$ th mode). The second equality follows from

the following fixed point characterization of  $\mathbf{G}_{\mathfrak{C}}$ :

$$\begin{aligned}
 \mathbf{G}_{\mathfrak{C}} &= \sum_{c \in \mathfrak{C}} \boldsymbol{\alpha}(c) \boldsymbol{\alpha}(c)^\top \\
 &= \boldsymbol{\alpha} \boldsymbol{\alpha}^\top \\
 &+ \sum_{c \in \mathfrak{C}, t \in \mathfrak{T}} \mathcal{T}(\boldsymbol{\alpha}(c), \boldsymbol{\omega}(t), \mathbf{I}) \mathcal{T}(\boldsymbol{\alpha}(c), \boldsymbol{\omega}(t), \mathbf{I})^\top \\
 &+ \sum_{c \in \mathfrak{C}, t \in \mathfrak{T}} \mathcal{T}(\boldsymbol{\alpha}(c), \mathbf{I}, \boldsymbol{\omega}(t)) \mathcal{T}(\boldsymbol{\alpha}(c), \mathbf{I}, \boldsymbol{\omega}(t))^\top \\
 &= \boldsymbol{\alpha} \boldsymbol{\alpha}^\top \\
 &+ \mathbf{T}_{(2)} (\mathbf{G}_{\mathfrak{C}} \otimes \mathbf{G}_{\mathfrak{T}}) \mathbf{T}_{(2)}^\top \\
 &+ \mathbf{T}_{(3)} (\mathbf{G}_{\mathfrak{C}} \otimes \mathbf{G}_{\mathfrak{T}}) \mathbf{T}_{(3)}^\top .
 \end{aligned}$$

□

**Theorem.** For any  $t \in \mathfrak{T}$ ,  $c \in \mathfrak{C}$  and  $i, j, k \in [n]$  the following hold:

- $|\boldsymbol{\omega}(t)_i| \leq \sqrt{\mathfrak{s}_i}$ ,
- $|\boldsymbol{\alpha}(c)_i| \leq \sqrt{\mathfrak{s}_i}$ , and
- $|\mathcal{T}(i, j, k)| \leq \min\left\{\frac{\sqrt{\mathfrak{s}_i}}{\sqrt{\mathfrak{s}_j} \sqrt{\mathfrak{s}_k}}, \frac{\sqrt{\mathfrak{s}_j}}{\sqrt{\mathfrak{s}_i} \sqrt{\mathfrak{s}_k}}, \frac{\sqrt{\mathfrak{s}_k}}{\sqrt{\mathfrak{s}_i} \sqrt{\mathfrak{s}_j}}\right\}$ .

*Proof.* The third point is a direct consequence of the previous Lemma. For the first point, let  $\mathbf{UDV}^\top$  be the SVD of  $\mathbf{H}_f$ . Since  $A$  is a SVTA we have

$$\boldsymbol{\omega}(t)_i^2 = (\mathbf{D}^{1/2} \mathbf{V}^\top)_{i,t}^2 = \mathfrak{s}_i \mathbf{V}(t, i)^2$$

and since the rows of  $\mathbf{V}$  are orthonormal we have  $\mathbf{V}(t, i)^2 \leq 1$ .

The inequality for contexts is proved similarly by reasoning on the rows of  $\mathbf{UD}^{1/2}$ . □

## References

- [1] R. Bailly, A. Habrard, and F. Denis. A spectral approach for probabilistic grammatical inference on trees. In *Proceedings of ALT*, 2010.
- [2] J. B. Conway. *A course in functional analysis*. Springer, 1990.
- [3] L. El Ghaoui. Inversion error, condition number, and approximate inverses of uncertain matrices. *Linear algebra and its applications*, 2002.
- [4] J. M. Ortega. *Numerical analysis: a second course*. Siam, 1990.
